# Supplementary material for: Invasive potential of tropical fruit flies in temperate regions under climate change
Source: PubMed Central journal article supplement (PMC8484444; doi:10.1038/s42003-021-02599-9), 2021-09-30
Supplement: 42003_2021_2599_MOESM3_ESM.pdf [file 42003_2021_2599_MOESM3_ESM.pdf]

## Description of Additional Supplementary Files

**Filename:** Supplementary Data 1

**Description:** Source data for the oriental fruit fly

**Filename:** Supplementary Data 2

**Description:** Source data for the Mexican fruit fly

**Filename:** Supplementary Data 3

**Description:** Source data for the melon fruit fly

**Filename:** Supplementary Data 4

**Description:** Source data for the Mediterranean fruit fly
